# Supplementary material
Source: MDPI journal article supplement (https://www.mdpi.com/2311-7524/7/2/27)
Supplement: s1 [file s1]

Table S1 – Commercial products sprayed as pest or disease management for first and second cycles of tomato grown in organic system.

| First cycle (2015)  |                    |                               |                       |
|---------------------|--------------------|-------------------------------|-----------------------|
| Date                | Commercial product | Active ingredient             | Concentration         |
| September 17, 2015  | Dioxiplus          | Chlorine dioxide              | 0.1%                  |
| September 27, 2015  | Dioxiplus          | Chlorine dioxide              | 0.1%                  |
| September 27, 2015  | Azamax             | Neem oil                      | 0.3%                  |
| October 13, 2015    | Dioxiplus          | Chlorine dioxide              | 0.1%                  |
| October 15, 2015    | Dioxiplus          | Chlorine dioxide              | 0.1%                  |
| October 15, 2015    | Azamax             | Neem oil                      | 0.3%                  |
| October 20, 2015    | Agree              | <i>Bacillus thuringiensis</i> | 0.6 g L <sup>-1</sup> |
| October 22, 2015    | Dioxiplus          | Chlorine dioxide              | 0.1%                  |
| October 22, 2015    | Azamax             | Neem oil                      | 0.3%                  |
| October 28, 2015    | Agree              | <i>Bacillus thuringiensis</i> | 0.6 g L <sup>-1</sup> |
| Second cycle (2016) |                    |                               |                       |
| February 24, 2016   | Dioxiplus          | Chlorine dioxide              | 0.1%                  |
| February 25, 2016   | Bordeaux mixture   | Copper hydroxide              | 1%                    |
| March 1, 2016       | Agree              | <i>Bacillus thuringiensis</i> | 0.6 g L <sup>-1</sup> |
| March 4, 2016       | Dioxiplus          | Chlorine dioxide              | 0.1%                  |
| March 5, 2016       | Azamax             | Neem oil                      | 0.3%                  |
| March 10, 2016      | Dioxiplus          | Chlorine dioxide              | 0.1%                  |
| March 14, 2016      | Agree              | <i>Bacillus thuringiensis</i> | 0.6 g L <sup>-1</sup> |
| March 22, 2016      | Azamax             | Neem oil                      | 0.3%                  |
| March 22, 2016      | Dioxiplus          | Chlorine dioxide              | 0.1%                  |
| March 28, 2016      | Bioactive          | D-limonene                    | 0.3%                  |
| March 30, 2016      | Azamax             | Neem oil                      | 0.3%                  |
| April 8, 2016       | Dioxiplus          | Chlorine dioxide              | 0.1%                  |
| April 9, 2016       | Bioactive          | D-limonene                    | 0.3%                  |
| April 19, 2016      | Bioactive          | D-limonene                    | 0.3%                  |
| April 25, 2016      | Dioxiplus          | Chlorine dioxide              | 0.1%                  |
| April 25, 2016      | Agree              | <i>Bacillus thuringiensis</i> | 0.6 g L <sup>-1</sup> |
| May 9, 2016         | Dioxiplus          | Chlorine dioxide              | 0.1%                  |
| May 10, 2016        | Agree              | <i>Bacillus thuringiensis</i> | 0.6 g L <sup>-1</sup> |
| May 17, 2016        | Bioactive          | D-limonene                    | 0.3%                  |
| May 17, 2016        | Dioxiplus          | Chlorine dioxide              | 0.1%                  |
| May 21, 2016        | Bordeaux mixture   | Copper hydroxide              | 1%                    |
| May 21, 2016        | Azamax             | Neem oil                      | 0.3%                  |
| May 24, 2016        | Agree              | <i>Bacillus thuringiensis</i> | 0.6 g L <sup>-1</sup> |
| May 31, 2016        | Bioactive          | D-limonene                    | 0.3%                  |
| June 11, 2016       | Dioxiplus          | Chlorine dioxide              | 0.1%                  |
